# Supplementary material for: Prefrontal Cortex Responses to Social Video Stimuli in Young Children with and without Autism Spectrum Disorder
Source: MDPI journal article supplement (doi:10.3390/brainsci14050503), 2024-05-16
Supplement: s1 [file s1]

Supplementary Material for

## Prefrontal cortex responses to social video stimuli in young children with and without autism spectrum disorder

Candida Barreto<sup>1</sup>, Adrian Curtin<sup>1</sup>, Yigit Topoglu<sup>1</sup>, Jessica Day-Watkins<sup>2</sup>, Brigid Garvin<sup>3</sup>, Grant Foster<sup>1</sup>, Zuhail Ormanoglu<sup>1</sup>, Elisabeth Sheridan<sup>2</sup>, James Connell Jr.<sup>4</sup>, David Bennett<sup>5</sup>, Karen Heffler<sup>5</sup>, and Hasan Ayaz<sup>1,2,6-9,\*</sup>

Table S1. Additional demographic information of participants

| Demographics                                                      | ASD (n=12)    | TD (n=16)       |
|-------------------------------------------------------------------|---------------|-----------------|
| <i>Race</i>                                                       |               |                 |
| Afro American                                                     | 2 (16.6%%)    | 3 (18.75%)      |
| Asian                                                             | 2 (16.6%)     | 3 (18.75%)      |
| White                                                             | 6 (50.0%)     | 6 (37.5%)       |
| Multiple                                                          | 2 (16.6%)     | 4 (25%)         |
| Maternal age when the child was born.<br>(mean $\pm$ sd) in years | 30 $\pm$ 4.41 | 32.9 $\pm$ 5.43 |
| Pregnancy (weeks):                                                | 39.5 (2.393)  | 38.81(1.680)    |
| Baby's birth weight                                               |               |                 |
| Low                                                               | 1 (8.33%)     | 1 (6.25%)       |
| Normal                                                            | 9 (75%)       | 15 (93.75%)     |
| High                                                              | 2 (16.66%)    |                 |
